# Supplementary material for: p53 SUMOylation Mediates AOPP-Induced Endothelial Senescence and Apoptosis Evasion
Source: PubMed Central journal article supplement (PMC8850781; doi:10.3389/fcvm.2021.795747), 2022-02-03
Supplement: Data_Sheet_2.pdf [file Data_Sheet_2.pdf]

## Major Resources Table

### Animals (in vivo studies)

| Species | Vendor or Source | Background Strain | Sex | Persistent ID / URL |
|---------|------------------|-------------------|-----|---------------------|
|         |                  |                   |     |                     |

### Genetically Modified Animals

|               | Species | Vendor or Source       | Background Strain                    | Other Information | Persistent ID / URL                                                                                                           |
|---------------|---------|------------------------|--------------------------------------|-------------------|-------------------------------------------------------------------------------------------------------------------------------|
| Parent - Male | Mouse   | GemPharmatech Co., Ltd | B6/JGpt-Apoe <sup>em1Cd82</sup> /Gpt | Apoe KO           | <a href="http://order.gempharmatech.com/stain/index?keyword=Apoe">http://order.gempharmatech.com/stain/index?keyword=Apoe</a> |

### Antibodies

| Target antigen             | Vendor or Source          | Catalog #  | Working concentration                                | Persistent ID / URL                                                                                                                                                                                                                                                                                                                                                                       |
|----------------------------|---------------------------|------------|------------------------------------------------------|-------------------------------------------------------------------------------------------------------------------------------------------------------------------------------------------------------------------------------------------------------------------------------------------------------------------------------------------------------------------------------------------|
| RAGE                       | Abcam                     | Ab216329   | 1:1000 for WB<br>1:100 for IHC                       | <a href="https://www.abcam.cn/rage-antibody-epr21171-ab216329.html">https://www.abcam.cn/rage-antibody-epr21171-ab216329.html</a>                                                                                                                                                                                                                                                         |
| p16                        | ABclonal                  | A0262      | 1:1000 for WB<br>1:200 for IHC                       | <a href="https://abclonal.com.cn/catalog/A0262">https://abclonal.com.cn/catalog/A0262</a>                                                                                                                                                                                                                                                                                                 |
| p21                        | ABclonal                  | A2691      | 1:1000 for WB                                        | <a href="https://abclonal.com.cn/catalog/A2691">https://abclonal.com.cn/catalog/A2691</a>                                                                                                                                                                                                                                                                                                 |
| p53                        | Immunoway                 | YT3528     | 1:1000 for WB                                        | <a href="http://www.immunoway.com/Home/22/YT3528">http://www.immunoway.com/Home/22/YT3528</a>                                                                                                                                                                                                                                                                                             |
| p53                        | Proteintech               | 60283-2-Ig | 1:50 for IP                                          | <a href="https://www.ptgcn.com/products/P53-Antibody-60283-2-Ig.htm">https://www.ptgcn.com/products/P53-Antibody-60283-2-Ig.htm</a>                                                                                                                                                                                                                                                       |
| Acetyl-p53 (K386)          | Immunoway                 | YK0017     | 1:1000 for WB                                        | <a href="http://www.immunoway.com/Home/22/YK0017">http://www.immunoway.com/Home/22/YK0017</a>                                                                                                                                                                                                                                                                                             |
| SUMO1                      | Immunoway                 | YT4470     | 1:1000 for WB<br>1:200 for IHC                       | <a href="http://www.immunoway.com/Home/22/YT4470">http://www.immunoway.com/Home/22/YT4470</a>                                                                                                                                                                                                                                                                                             |
| LC3A/B                     | Cell Signaling Technology | 12741      | 1:1000 for WB<br>1:100 for IF<br>1:100 for IHC       | <a href="https://www.cellsignal.cn/products/primary-antibodies/lc3a-b-d3u4c-xp-rabbit-mab/12741?site-search-type=Products&amp;N=4294956287&amp;Ntt=12741&amp;fromPage=plp&amp;requestid=914932">https://www.cellsignal.cn/products/primary-antibodies/lc3a-b-d3u4c-xp-rabbit-mab/12741?site-search-type=Products&amp;N=4294956287&amp;Ntt=12741&amp;fromPage=plp&amp;requestid=914932</a> |
| p62                        | ABclonal                  | A7758      | 1:1000 for WB                                        | <a href="https://abclonal.com.cn/catalog/A7758">https://abclonal.com.cn/catalog/A7758</a>                                                                                                                                                                                                                                                                                                 |
| Beclin1                    | Proteintech               | 11306-1-AP | 1:1000 for WB                                        | <a href="https://www.ptgcn.com/products/BECN1-Antibody-11306-1-AP.htm">https://www.ptgcn.com/products/BECN1-Antibody-11306-1-AP.htm</a>                                                                                                                                                                                                                                                   |
| Bcl-2                      | Immunoway                 | YT0470     | 1:1000 for WB                                        | <a href="http://www.immunoway.com/Home/22/YT0470">http://www.immunoway.com/Home/22/YT0470</a>                                                                                                                                                                                                                                                                                             |
| Bax                        | Immunoway                 | YT0455     | 1:1000 for WB                                        | <a href="http://www.immunoway.com/Home/22/YT0455">http://www.immunoway.com/Home/22/YT0455</a>                                                                                                                                                                                                                                                                                             |
| Caspase-3                  | Cell Signaling Technology | 9662       | 1:1000 for WB                                        | <a href="https://www.cellsignal.cn/products/primary-antibodies/caspase-3-antibody/9662?site-search-type=Products&amp;N=4294956287&amp;Ntt=9662&amp;fromPage=plp">https://www.cellsignal.cn/products/primary-antibodies/caspase-3-antibody/9662?site-search-type=Products&amp;N=4294956287&amp;Ntt=9662&amp;fromPage=plp</a>                                                               |
| RAGE neutralizing antibody | R&D                       | MAB11451   | 10 µg/mL for blockade of receptor-ligand interaction | <a href="https://www.rndsystems.com/cn/products/human-rage-antibody-176902_mab11451">https://www.rndsystems.com/cn/products/human-rage-antibody-176902_mab11451</a>                                                                                                                                                                                                                       |
| Mouse IgG                  | ABclonal                  | AC011      | 1:50 for IP                                          | <a href="https://abclonal.com.cn/catalog/AC011">https://abclonal.com.cn/catalog/AC011</a>                                                                                                                                                                                                                                                                                                 |
| GAPDH                      | Beijing Ray               | RM2002     | 1:5000 for WB                                        | <a href="http://www.rayantibody.com/index.php?c=product&amp;a=type&amp;tid=13">http://www.rayantibody.com/index.php?c=product&amp;a=type&amp;tid=13</a>                                                                                                                                                                                                                                   |

|                      |             |                  |               |                                                                                                                                                         |
|----------------------|-------------|------------------|---------------|---------------------------------------------------------------------------------------------------------------------------------------------------------|
| β-actin              | Beijing Ray | RM2001           | 1:5000 for WB | <a href="http://www.rayantibody.com/index.php?c=product&amp;a=type&amp;tid=13">http://www.rayantibody.com/index.php?c=product&amp;a=type&amp;tid=13</a> |
| Secondary antibodies | Beijing Ray | RM3001<br>RM3002 | 1:5000 for WB | <a href="http://www.rayantibody.com/index.php?c=product&amp;a=type&amp;tid=15">http://www.rayantibody.com/index.php?c=product&amp;a=type&amp;tid=15</a> |
| DAPI                 | Solarbio    | C0065            | for IF        | <a href="http://m.solarbio.com/goods-258.html">http://m.solarbio.com/goods-258.html</a>                                                                 |
| Alexa Fluor 594      | Immunoway   | RS3611           | 1:200 for IF  | <a href="http://www.immunoway.com/Home/22/RS3611">http://www.immunoway.com/Home/22/RS3611</a>                                                           |

### DNA/cDNA Clones

| Clone Name                  | Sequence                                                                                                                                                                                                                                                                                                                                                                                                                                                                                                                                                                                                                                                                                                                                                                                                                                                                                                                                                                                                                                                                                                                                                                                                                                                                                                                                                                                                                                                                                                                                                                | Source / Repository | Persistent ID / URL                                                                                                                                               |
|-----------------------------|-------------------------------------------------------------------------------------------------------------------------------------------------------------------------------------------------------------------------------------------------------------------------------------------------------------------------------------------------------------------------------------------------------------------------------------------------------------------------------------------------------------------------------------------------------------------------------------------------------------------------------------------------------------------------------------------------------------------------------------------------------------------------------------------------------------------------------------------------------------------------------------------------------------------------------------------------------------------------------------------------------------------------------------------------------------------------------------------------------------------------------------------------------------------------------------------------------------------------------------------------------------------------------------------------------------------------------------------------------------------------------------------------------------------------------------------------------------------------------------------------------------------------------------------------------------------------|---------------------|-------------------------------------------------------------------------------------------------------------------------------------------------------------------|
| TP53(NM_000546(K386R)) cDNA | gcagatcgaattaagcttgggctgcaggtcgactctagaggatcccgccacat<br>ggaggagccgcagtcagatcctagcgtcgagccccctctgagtcaggaaacatt<br>ttcagacctatggaaactacttctgaaaacaacgttctgtcccccttgccgtccc<br>aagcaatggatgattgatgctgtccccggacgatattgaacaatggttactga<br>agaccaggtccagatgaagctcccagaatgccagaggctgtccccctggc<br>ccctgcaccagcagctcctacaccggcgccctgcaccagccccctctggcc<br>cctgtcatcttctgtccctccagaaaacctaccagggcagctacggtttccgtct<br>gggcttctgattctgggacagccaagtctgtgacttgacgtactcccctgcc<br>tcaacaagatgtttgccaactggccaagacctgccctgtgagctgtgggtga<br>ttcacacccccgccggcaccgctccgcatggccatctacaagcagtc<br>acagcacatgacggaggttgtagggcgtgccccaccatgagcgtgctcaga<br>tagcagtggttggccccctcagcatctatccagtggaaggaaatttgcgtg<br>tggagtattggatgacagaaacttttcagatagtggtggtgccctatgag<br>ccgctgaggttggctctgactgtaccacatccactacaactacatgttaaca<br>gttctgcatggggcgatgaaccggaggccatcctcaccatcatcacactgga<br>agactccagtggaatctactgggacggaacagcttgaggtgcgtgtttgtgct<br>gtcctgggagagaccggcgacagaggaagagaatctccgaagaaggggga<br>gcctcaccacgagctgccccaggagcactaagcgagcactgccaacaaca<br>ccagctcctccccagccaaagaagaaaccactggatggagaatatttacc<br>ttcagatccgtggcgctgagcgttcgagatgttcgagagctgaatgaggcctt<br>ggaactcaaggatgcccaggctgggaaggagccaggggggagcagggtcac<br>tccagccactgaagtcacaaaagggtcagctctacctcccgcataaaaaactc<br>atgttcaggacagaaggcctgactcagacggatgactacaaggatgacgat<br>gacaaggattacaagacgacgatgataaggactataaggatgatgacgaaa<br>agctagctaactgtggaatgtgtgtcagttaggggtggaaagtcagggtcc<br>ccagcaggcagaagtatgcaaagcatgcatctcaattagtcagcaaccaggtg<br>ggaaagtcagggtccccagcaggcagaagtatgcaaagcatgcatctcaat<br>tagtcagc | Genechem            | Does not apply                                                                                                                                                    |
| TP53 Fwd Primer             | aggtcgactctagaggatcccgccacatggaggagccgcagtcagatc                                                                                                                                                                                                                                                                                                                                                                                                                                                                                                                                                                                                                                                                                                                                                                                                                                                                                                                                                                                                                                                                                                                                                                                                                                                                                                                                                                                                                                                                                                                        | Genechem            | Does not apply                                                                                                                                                    |
| TP53 Rev Primer             | tcctttagtccataccgtctgagtcaggcccccttctgtcctgaac                                                                                                                                                                                                                                                                                                                                                                                                                                                                                                                                                                                                                                                                                                                                                                                                                                                                                                                                                                                                                                                                                                                                                                                                                                                                                                                                                                                                                                                                                                                          | Genechem            | Does not apply                                                                                                                                                    |
| GV314 (Adenoviral Vector)   | <a href="https://www.genechem.com.cn/index/supports/zaiti_info.html?keywords=GV314">https://www.genechem.com.cn/index/supports/zaiti_info.html?keywords=GV314</a>                                                                                                                                                                                                                                                                                                                                                                                                                                                                                                                                                                                                                                                                                                                                                                                                                                                                                                                                                                                                                                                                                                                                                                                                                                                                                                                                                                                                       | Genechem            | <a href="https://www.genechem.com.cn/index/supports/zaiti_info.html?keywords=GV314">https://www.genechem.com.cn/index/supports/zaiti_info.html?keywords=GV314</a> |

## Cultured Cells

| Name                                   | Vendor or Source | Sex (F, M, or unknown) | Persistent ID / URL                                                                                                                                                   |
|----------------------------------------|------------------|------------------------|-----------------------------------------------------------------------------------------------------------------------------------------------------------------------|
| Human umbilical vein endothelial cells | ScienCell        | unknown                | <a href="https://www.sciencellonline.com/human-umbilical-vein-endothelial-cells.html">https://www.sciencellonline.com/human-umbilical-vein-endothelial-cells.html</a> |

## Data & Code Availability

| Description | Source / Repository | Persistent ID / URL |
|-------------|---------------------|---------------------|
|             |                     |                     |

## Other

| Description                                    | Source / Repository | Persistent ID / URL                                                                                                                                                                                                                                                                                                       |
|------------------------------------------------|---------------------|---------------------------------------------------------------------------------------------------------------------------------------------------------------------------------------------------------------------------------------------------------------------------------------------------------------------------|
| Endothelial cell medium                        | ScienCell           | <a href="https://www.sciencellonline.com/endothelial-cell-medium.html">https://www.sciencellonline.com/endothelial-cell-medium.html</a>                                                                                                                                                                                   |
| Endothelial cell growth supplement             | ScienCell           | <a href="https://www.sciencellonline.com/endothelial-cell-growth-supplement.html">https://www.sciencellonline.com/endothelial-cell-growth-supplement.html</a>                                                                                                                                                             |
| Fetal bovine serum                             | ScienCell           | <a href="https://www.sciencellonline.com/fetal-bovine-serum.html">https://www.sciencellonline.com/fetal-bovine-serum.html</a>                                                                                                                                                                                             |
| HBSS                                           | Gibco               | <a href="https://www.thermofisher.cn/order/catalog/product/14025092?SID=srch-srp-14025092#/14025092?SID=srch-srp-14025092">https://www.thermofisher.cn/order/catalog/product/14025092?SID=srch-srp-14025092#/14025092?SID=srch-srp-14025092</a>                                                                           |
| Cell Counting Kit-8                            | Invigentech         | <a href="http://www.ivigt.com/content/?212.html">http://www.ivigt.com/content/?212.html</a>                                                                                                                                                                                                                               |
| Matrigel Matrix                                | Corning             | <a href="https://ecatalog.corning.com/life-sciences/b2c/US/en/Surfaces/Extracellular-Matrices-ECMs/Corning%C2%AE-Matrigel%C2%AE-Matrix/p/corningMatrigelMatrix">https://ecatalog.corning.com/life-sciences/b2c/US/en/Surfaces/Extracellular-Matrices-ECMs/Corning%C2%AE-Matrigel%C2%AE-Matrix/p/corningMatrigelMatrix</a> |
| Collagen I, Rat tail                           | Corning             | <a href="https://ecatalog.corning.com/life-sciences/b2c/US/en/Surfaces/Extracellular-Matrices-ECMs/Corning%C2%AE-Collagen/p/corningCollagen">https://ecatalog.corning.com/life-sciences/b2c/US/en/Surfaces/Extracellular-Matrices-ECMs/Corning%C2%AE-Collagen/p/corningCollagen</a>                                       |
| FITC-dextran                                   | Sigma-Aldrich       | <a href="https://www.sigmaaldrich.cn/CN/zh/product/sigma/fd40s?context=product">https://www.sigmaaldrich.cn/CN/zh/product/sigma/fd40s?context=product</a>                                                                                                                                                                 |
| Rapamycin                                      | MedChemExpress      | <a href="https://www.medchemexpress.cn/Rapamycin.html">https://www.medchemexpress.cn/Rapamycin.html</a>                                                                                                                                                                                                                   |
| 3-MA                                           | Selleck             | <a href="https://www.selleck.cn/products/3-methyladenine.html">https://www.selleck.cn/products/3-methyladenine.html</a>                                                                                                                                                                                                   |
| Protein A+G Agarose                            | Beyotime            | <a href="https://www.beyotime.com/product/P2012.htm">https://www.beyotime.com/product/P2012.htm</a>                                                                                                                                                                                                                       |
| Senescence $\beta$ -galactosidase staining kit | Beyotime            | <a href="https://www.beyotime.com/product/C0602.htm">https://www.beyotime.com/product/C0602.htm</a>                                                                                                                                                                                                                       |
| Annexin V-FITC/PI apoptosis detection kit      | BestBio             | <a href="http://www.bestbio.com.cn/goods.php?id=53">http://www.bestbio.com.cn/goods.php?id=53</a>                                                                                                                                                                                                                         |
| siRNA-Mate                                     | GenePharma          | <a href="https://www.genepharma.com/show.php?ctype=0&amp;coupid=568&amp;cateid=111">https://www.genepharma.com/show.php?ctype=0&amp;coupid=568&amp;cateid=111</a>                                                                                                                                                         |
